# Supplementary material for: Multisensory benefits for speech recognition in noisy environments
Source: Front Neurosci. 2022 Oct 20;16:1031424. doi: 10.3389/fnins.2022.1031424 (PMC9630463; doi:10.3389/fnins.2022.1031424)
Supplement: Supplementary file 1 [file Table_1.XLSX]

## Sheet: Sheet1
Table 1. Pairwise comparisons of the fixed factors used in the linear mixed model (LMM) analysis
Names	Effect	Estimate	SE	95% Confidence Interval		df	t	p
				Lower	Upper
Gender	Female - Male	0.12896	0.0049	0.11937	0.13855	741	26.344	< .001
Stimulus condition	AV - AO	0.06115	0.00692	0.04758	0.07472	741	8.833	< .001
	AT - AO	0.06415	0.00692	0.05059	0.07772	741	9.267	< .001
	AVT - AO	0.11648	0.00692	0.10292	0.13005	741	16.826	< .001
SNR	-5 - -7	0.13264	0.00774	0.11747	0.14781	741	17.137	< .001
	-3 - -7	0.23137	0.00774	0.2162	0.24654	741	29.892	< .001
	-1 - -7	0.37336	0.00774	0.35819	0.38853	741	48.236	< .001
	1 - -7	0.47573	0.00774	0.46056	0.4909	741	61.463	< .001
Gender ✻ Stimulus condition	Female - Male ✻ AV - AO	-0.00496	0.01385	-0.0321	0.02218	741	-0.358	0.72
	Female - Male ✻ AT - AO	-0.01657	0.01385	-0.04371	0.01057	741	-1.197	0.232
	Female - Male ✻ AVT - AO	0.01877	0.01385	-0.00837	0.04591	741	1.356	0.176
Gender ✻ SNR	Female - Male ✻ -5 - -7	0.00341	0.01548	-0.02693	0.03375	741	0.22	0.826
	Female - Male ✻ -3 - -7	0.09129	0.01548	0.06095	0.12163	741	5.897	< .001
	Female - Male ✻ -1 - -7	-0.05374	0.01548	-0.08408	-0.0234	741	-3.471	< .001
	Female - Male ✻ 1 - -7	-0.12866	0.01548	-0.159	-0.09832	741	-8.311	< .001
Stimulus condition ✻ SNR	AV - AO ✻ -5 - -7	-0.04227	0.02189	-0.08518	0.000633	741	-1.931	0.054
	AT - AO ✻ -5 - -7	-0.00792	0.02189	-0.05083	0.03498	741	-0.362	0.717
	AVT - AO ✻ -5 - -7	-0.05662	0.02189	-0.09953	-0.01372	741	-2.587	0.01
	AV - AO ✻ -3 - -7	-0.04575	0.02189	-0.08866	-0.00284	741	-2.09	0.037
	AT - AO ✻ -3 - -7	-0.02597	0.02189	-0.06888	0.01693	741	-1.186	0.236
	AVT - AO ✻ -3 - -7	-0.0736	0.02189	-0.11651	-0.03069	741	-3.362	< .001
	AV - AO ✻ -1 - -7	-0.13767	0.02189	-0.18058	-0.09477	741	-6.289	< .001
	AT - AO ✻ -1 - -7	-0.08725	0.02189	-0.13016	-0.04434	741	-3.985	< .001
	AVT - AO ✻ -1 - -7	-0.19255	0.02189	-0.23546	-0.14964	741	-8.795	< .001
	AV - AO ✻ 1 - -7	-0.12267	0.02189	-0.16558	-0.07977	741	-5.604	< .001
	AT - AO ✻ 1 - -7	-0.09845	0.02189	-0.14136	-0.05554	741	-4.497	< .001
	AVT - AO ✻ 1 - -7	-0.20455	0.02189	-0.24746	-0.16164	741	-9.343	< .001
Gender ✻ Stimulus condition ✻ SNR	Female - Male ✻ AV - AO ✻ -5 - -7	-0.02055	0.04378	-0.10637	0.06527	741	-0.469	0.639
	Female - Male ✻ AT - AO ✻ -5 - -7	0.04865	0.04378	-0.03717	0.13447	741	1.111	0.267
	Female - Male ✻ AVT - AO ✻ -5 - -7	-0.02085	0.04378	-0.10667	0.06497	741	-0.476	0.634
	Female - Male ✻ AV - AO ✻ -3 - -7	0.0221	0.04378	-0.06372	0.10792	741	0.505	0.614
	Female - Male ✻ AT - AO ✻ -3 - -7	-0.03935	0.04378	-0.12517	0.04647	741	-0.899	0.369
	Female - Male ✻ AVT - AO ✻ -3 - -7	-0.078	0.04378	-0.16382	0.00782	741	-1.781	0.075
	Female - Male ✻ AV - AO ✻ -1 - -7	0.00815	0.04378	-0.07767	0.09397	741	0.186	0.852
	Female - Male ✻ AT - AO ✻ -1 - -7	-0.0153	0.04378	-0.10112	0.07052	741	-0.349	0.727
	Female - Male ✻ AVT - AO ✻ -1 - -7	-0.0568	0.04378	-0.14262	0.02902	741	-1.297	0.195
	Female - Male ✻ AV - AO ✻ 1 - -7	0.03225	0.04378	-0.05357	0.11807	741	0.737	0.462
	Female - Male ✻ AT - AO ✻ 1 - -7	0.0194	0.04378	-0.06642	0.10522	741	0.443	0.658
	Female - Male ✻ AVT - AO ✻ 1 - -7	-0.0415	0.04378	-0.12732	0.04432	741	-0.948	0.344
